# Supplementary material for: Kidney Dysfunction and Pathology in the Setting of Hemophagocytic Lymphohistiocytosis
Source: PubMed Central journal article supplement — Kidney Int Rep. 2023 Nov 7;9(2):410–22. doi: 10.1016/j.ekir.2023.10.033 (PMC10851018; doi:10.1016/j.ekir.2023.10.033), 2023-11-07
Supplement: mmc1.pdf [file mmc1.pdf]

**Table S1.** Diagnostic guidelines for HLH as proposed by the Histiocyte Society (HLH-2004, adapted from Henter *et al.*<sup>1)</sup>)

|                                                                                                                                                                                                                                                                                                                              |
|------------------------------------------------------------------------------------------------------------------------------------------------------------------------------------------------------------------------------------------------------------------------------------------------------------------------------|
| <p>The diagnosis of HLH can be established if one of either 1 or 2 below is fulfilled:</p> <p>1) A molecular diagnosis consistent with HLH</p> <p>2) Diagnostic criteria for HLH fulfilled (five out of the eight criteria below)</p>                                                                                        |
| Fever                                                                                                                                                                                                                                                                                                                        |
| Splenomegaly                                                                                                                                                                                                                                                                                                                 |
| <p>Cytopenias (affecting <math>\geq 2</math> of 3 lineages in the peripheral blood):</p> <p>Hemoglobin <math>&lt; 90</math> g/L (in infants <math>&lt; 4</math> weeks: hemoglobin <math>&lt; 100</math> g/L)</p> <p>Platelets <math>&lt; 100 \times 10^9/L</math></p> <p>Neutrophils <math>&lt; 1.0 \times 10^9/L</math></p> |
| <p>Hypertriglyceridemia and/or hypofibrinogenemia:</p> <p>Fasting triglycerides <math>\geq 3.0</math> mmol/L (<i>i.e.</i>, <math>\geq 265</math> mg/dl)</p> <p>Fibrinogen <math>\leq 1.5</math> g/L</p>                                                                                                                      |
| Hemophagocytosis in bone marrow or spleen or lymph nodes                                                                                                                                                                                                                                                                     |
| Low or absent NK-cell activity                                                                                                                                                                                                                                                                                               |
| Ferritin $\geq 500$ $\mu\text{g/L}$                                                                                                                                                                                                                                                                                          |
| Soluble CD25 ( <i>i.e.</i> , soluble IL-2 receptor) $\geq 2,400$ U/mL                                                                                                                                                                                                                                                        |

**Table S2.** Additional laboratory testing for lactate dehydrogenase and liver/biliary functional markers

| <b>Tested analyte</b> (reference range)             | <b>Number of cases of total tested with elevated values</b> (prevalence rate) | <b>Median</b> (interquartile range) |
|-----------------------------------------------------|-------------------------------------------------------------------------------|-------------------------------------|
| <b>Lactate dehydrogenase (LDH)</b><br>(115-221 U/L) | 26 of 28 (93%)                                                                | 514 U/L (311-916 U/L)               |
| <b>Aspartate transferase (AST)</b> (12-38 U/L)      | 20 of 30 (67%)                                                                | 109 U/L (31-292 U/L)                |
| <b>Alanine aminotransferase (ALT)</b><br>(7-41 U/L) | 16 of 30 (53%)                                                                | 45 U/L (25-94 U/L)                  |
| <b>Gamma-glutamyl transferase (GGT)</b> (9-58 U/L)  | 13 of 16 (81)                                                                 | 199 U/L (73-721 U/L)                |
| <b>Total bilirubin</b> (0.2-1.3 mg/dL)              | 15 of 29 (52%)                                                                | 1.6 mg/dL (0.4-3.9 mg/dL)           |

**Table S3.** Detailed list of all immunosuppressive agents provided to patients in the setting of HLH

| <b>Immunosuppressive agent</b>     | <b>Number of patients receiving</b> (prevalence rate amongst all patients) |
|------------------------------------|----------------------------------------------------------------------------|
| <b>Corticosteroid*</b>             | <b>22 (73%)</b>                                                            |
| Methylprednisolone                 | 14 (47%)                                                                   |
| Prednisone                         | 8 (27%)                                                                    |
| Hydrocortisone                     | 8 (27%)                                                                    |
| Dexamethasone                      | 2 (7%)                                                                     |
| <b>Mycophenolate mofetil</b>       | <b>7 (23%)</b>                                                             |
| <b>Intravenous immune globulin</b> | <b>6 (20%)</b>                                                             |
| <b>Calcineurin inhibitor</b>       | <b>5 (17%)</b>                                                             |
| Cyclosporine                       | 3 (10%)                                                                    |
| Tacrolimus                         | 2 (7%)                                                                     |
| <b>Hydroxychloroquine</b>          | <b>4 (13%)</b>                                                             |
| <b>Anakinra</b>                    | <b>3 (10%)</b>                                                             |
| <b>Cyclophosphamide</b>            | <b>2 (7%)</b>                                                              |
| <b>Etoposide</b>                   | <b>2 (7%)</b>                                                              |
| <b>Rituximab</b>                   | <b>2 (7%)</b>                                                              |
| <b>Daclizumab</b>                  | <b>1 (3%)</b>                                                              |
| <b>Antithymocyte globulin</b>      | <b>1 (3%)</b>                                                              |
| <b>Alemtuzumab</b>                 | <b>1 (3%)</b>                                                              |
| <b>Infliximab</b>                  | <b>1 (3%)</b>                                                              |
| <b>Methotrexate</b>                | <b>1 (3%)</b>                                                              |

\*Nine patients received more than one corticosteroid for the management of HLH.
